1 **Specificity and effector functions of non-neutralizing gB-specific monoclonal**  
2 **antibodies isolated from healthy individuals with human cytomegalovirus infection**

3  
4 Matthew L. Goodwin<sup>1</sup>, Helen S. Webster<sup>1</sup>, Hsuan-Yuan Wang<sup>1</sup>, Jennifer A. Jenks<sup>1</sup>, Cody  
5 S. Nelson<sup>1</sup>, Joshua J. Tu<sup>1</sup>, Jesse Mangold<sup>1</sup>, Sarah Valencia<sup>1</sup>, Jason S. McLellan<sup>2</sup>, Daniel  
6 Wrapp<sup>2</sup>, Tong-Ming Fu<sup>3,4</sup>, Ningyan Zhang<sup>4</sup>, Daniel C Freed<sup>3</sup>, Dai Wang<sup>3</sup>, Zhiqiang An<sup>4</sup>,  
7 Sallie R. Permar<sup>1</sup>.

8  
9 <sup>1</sup> Duke Human Vaccine Institute, Duke University Medical Center, Durham, NC, USA.

10 <sup>2</sup> Department of Molecular Biosciences, The University of Texas at Austin, Austin, TX,  
11 USA.

12 <sup>3</sup> Merck & Co., Inc., Kenilworth, NJ, USA.

13 <sup>4</sup> Texas Therapeutics Institute, Brown Foundation Institute of Molecular Medicine, The  
14 University of Texas Health Science Center, Houston, USA.

15  
16 Corresponding author: Matthew L. Goodwin: [matthew.goodwin33@duke.edu](mailto:matthew.goodwin33@duke.edu)

17

18

19

20

21

22

23

24 **Abstract:**

25 Human cytomegalovirus (HCMV) is the most common congenital infection, and the  
26 leading nongenetic cause of sensorineural hearing loss (SNHL) in newborns globally. A  
27 gB subunit vaccine administered with adjuvant MF59 (gB/MF59) is the most efficacious  
28 tested to-date, achieving 50% efficacy in preventing infection of HCMV-seronegative  
29 mothers. We recently discovered that gB/MF59 vaccination elicited primarily non-  
30 neutralizing antibody responses, that HCMV strains acquired by vaccinees more often  
31 included strains with gB genotypes that are distinct from the vaccine antigen, and that  
32 protection against HCMV acquisition correlated with ability of vaccine-elicited antibodies  
33 to bind to membrane associated gB. Thus, we hypothesized that gB-specific non-  
34 neutralizing antibody binding breadth and function are dependent on their epitope and  
35 genotype specificity as well as their ability to interact with membrane-associated gB.  
36 Twenty-four gB-specific monoclonal antibodies (mAbs) isolated from naturally HCMV-  
37 infected individuals were mapped for gB domain specificity by binding antibody multiplex  
38 assay (BAMA) and for genotype preference binding to membrane-associated gB  
39 presented on transfected cells. We defined their non-neutralizing functions including  
40 antibody dependent cellular phagocytosis (ADCP) and antibody dependent cellular  
41 cytotoxicity (ADCC). The isolated gB-specific non-neutralizing mAbs were primarily  
42 specific for Domain II and linear antigenic domain 2 site 2 (AD2). We observed variability  
43 in mAb gB genotype binding preference, with increased binding to gB genotypes 2 and  
44 4. Functional studies identified two gB-specific mAbs that facilitate ADCP and have  
45 binding specificities of AD2 and Domain II. This investigation provides novel

46 understanding on the impact of gB domain specificity and antigenic variability on gB-  
47 specific non-neutralizing antibody responses.

48

49

50

51

52

53

54

55

56

57

58

59

60

61

62

63

64

65

66

67

68

69 **Importance:**

70 HCMV is the most common congenital infection worldwide, but development of a  
71 successful vaccine remains elusive. gB-specific non-neutralizing mAbs, represent a  
72 distinct anti-HCMV Ab subset implicated in the protection against primary infection during  
73 numerous phase-II gB/MF59 vaccine trials. By studying non-neutralizing gB-specific  
74 mAbs from naturally infected individuals, this study provides novel characterization of  
75 binding site specificity, genotypic preference, and effector cell functions mediated by  
76 mAbs elicited in natural infection. We found that a panel of twenty-four gB-specific non-  
77 neutralizing mAbs bind across multiple regions of the gB protein, traditionally through to  
78 be targeted by neutralizing mAbs only, and bind differently to gB depending if the protein  
79 is soluble versus embedded in a membrane. This investigation provides novel insight into  
80 the gB-specific binding characteristics and effector cell functions mediated by non-  
81 neutralizing gB-specific mAbs elicited through natural infection, providing new endpoints  
82 for future vaccine development.

83

84

85

86

87

88

89

90

91

92 **Introduction:**

93         Each year, an estimated 40,000 children in the U.S. are born with congenital  
94 human cytomegalovirus (HCMV) infection (cCMV), with roughly 8,000 afflicted children  
95 developing long term sequelae of disease such as sensorineural hearing loss,  
96 neurodevelopmental delay, visual impairment, and psychomotor disability [1, 2]. While  
97 mothers with primary HCMV infection during pregnancy have rates of vertical  
98 transmission up to 40%, mothers with HCMV reactivation or reinfection can also transmit  
99 the virus to their developing infant but at a rate in the range of <1-4% [3-5]. Additionally,  
100 HCMV infection post-transplantation and consequently graft rejection, remain significant  
101 complications for solid-organ transplant patients, especially for those HCMV naïve  
102 recipients with transplants from HCMV seropositive donors [6, 7]. Although the protective  
103 correlates of immunity against HCMV infection have not been fully elucidated, there is  
104 ample evidence that immune factors elicited by natural infection can confer some degree  
105 of protection for mothers, infants, and immunosuppressed individuals against HCMV  
106 reinfection or reactivation. Thus, understanding how natural immunity against HCMV  
107 mediates protection may offer the basis for development of an effective HCMV vaccine.

108         Numerous HCMV vaccine candidates have been tested clinically, including live-  
109 attenuated virus, viral glycoprotein subunit formulations, viral vectors, and single/bivalent  
110 DNA plasmids, yet few have demonstrated sufficient protection as compared to natural  
111 immunity to warrant late stage clinical development [8]. Interestingly, the glycoprotein B  
112 (gB/MF59) subunit vaccine achieved nearly 50% efficacy in preventing HCMV primary  
113 infection in distinct cohorts of HCMV seronegative postpartum women and adolescent  
114 girls [9, 10]. Moreover, in HCMV seronegative patients receiving organs from HCMV

115 seropositive donors, the gB/MF59 vaccine was shown to reduce the magnitude and  
116 duration of posttransplant HCMV viremia [11]. gB is a viral fusion protein, essential for  
117 viral infection of host cells, and is a target of both neutralizing and non-neutralizing  
118 antibodies [12]. Counterintuitively, the gB/MF59 vaccination elicited limited neutralizing  
119 responses when compared with HCMV seropositive individuals [13, 14]; yet, gB/MF59  
120 vaccination elicited effector-cell mediated antibody responses, including antibody  
121 dependent cellular phagocytosis (ADCP). This observation prompted a hypothesis that  
122 non-neutralizing antibodies against gB may contribute to protection against HCMV  
123 acquisition [13, 14]. Moreover, effector antibody functions mediated by NK cells may be  
124 crucial for targeting HCMV-infected cells, further underlying the significance of non-  
125 neutralizing antibodies in anti-HCMV immunity [15, 16].

126 gB is a homotrimeric class III fusion protein that contains 5 defined antigenic  
127 domains, namely AD1 - AD5, with AD2 site 1, AD4 (Domain II), and AD5 (Domain I) as  
128 the target of neutralizing antibodies, and AD2 site 2, AD1, and the furin cleavage site as  
129 reported primary targets of non-neutralizing antibodies [12, 17]. The transmembrane and  
130 intravirion domains of gB (AD3), are thought to be obscured from antibody recognition in  
131 the membrane-associated portion. Yet, the epitope-specific antibody responses  
132 stimulated by natural HCMV infection and gB/MF59 vaccination demonstrate AD3  
133 immunodominance, with 76% of total linear gB-specific antibody responses directed at  
134 this region in naturally HCMV infected vs 32% in gB/MF59 vaccinated individuals [12].  
135 Variation in epitope-specific antibody binding may also stem from gB genotype-specific  
136 differences amongst clinical HCMV strains [17]. In fact, differences amongst HCMV gB  
137 genotypes correlate with cell tropism during HCMV infection [18]. Interestingly, it was

138 recently reported that the ability of gB/MF59 vaccine sera to bind to membrane associated  
139 gB, via a transfected cell binding assay, predicts risk of HCMV acquisition [19].  
140 Furthermore, like HSV gB and VSV protein G, HCMV gB is undergoes significant  
141 conformational transition from prefusion to postfusion states to mediate viral and host-cell  
142 membrane fusion [20, 21]. Thus, the CMV vaccine field needs characterization of  
143 antibodies that bind distinctly to soluble postfusion gB constructs and cell-associated gB,  
144 with the latter possibility representing a distinct prefusion-like structure.

145         Because there are stark differences in the gB epitope binding profiles of naturally-  
146 infected individuals and gB/MF59 vaccinees [13, 22], closing the gap in our understanding  
147 of immune-protection offered by prior exposure to natural HCMV infection and vaccination  
148 will require investigation into how gB as an antigen induces potentially protective effector  
149 antibody responses. The aim of this study is to characterize the non-neutralizing gB-  
150 specific antibody responses in natural HCMV infection for a panel of gB-specific mAbs  
151 isolated by memory B cell cultures from three naturally infected individuals [23]. Towards  
152 this goal, we analyzed a panel of 24 mAbs by defining their target specificity for gB  
153 domains as well as genotype specificity, and analyzed effector functions for these mAbs  
154 in ADCC and ADCP assays. Understanding gB diversity, and how gB-specific antibodies  
155 bind and mediate antiviral functions across genotypes to different antigenic domains, will  
156 be critical if we hope to optimize anti-gB antibody responses in future iterations of a HCMV  
157 vaccine.

158

159

160

161 **Methods:**

162 **gB-specific monoclonal antibodies (mAbs).** gB-specific monoclonal antibodies  
163 (mAbs) were isolated from healthy adult volunteers with previous natural HCMV  
164 infection. Subjects were consented for blood sampling in accordance with NIH  
165 guidelines [23]. B cell isolation and recombinant monoclonal antibody isolation and  
166 production using a human IgG1 backbone was performed as previously described [23].  
167 Briefly, total RNA from isolated memory B cells, which screened positive for binding  
168 activity against gB, was converted to cDNA using a reverse transcription kit (Invitrogen),  
169 and IgG genes were identified by PCR primers. After cloning the variable regions of gB-  
170 specific mAbs from B cells from three donors the VH and VL sequences were cloned  
171 into a human IgG1 vector and recombinantly expressed in HEK293 cells in Zhiqiang  
172 An's laboratory at the University of Texas Health Science Center at Houston.

173

174 **Postfusion gB ectodomain trimer and gB domain protein expression and**  
175 **purification.** A p $\alpha$ H expression plasmid encoding an artificial signal sequence, residues  
176 32-692 of HCMV gB from strain AD-169 with solubilized fusion loops, as described  
177 previously [12, 24], and C-terminal 6xHis and TwinStrep tags was used to transiently  
178 transfect 293F cells. Secreted postfusion gB trimers were purified using Strep-Tactin  
179 resin (IBA Life Sciences) before being run over a Superose 6 size-exclusion column  
180 (GE Healthcare) in 2 mM Tris pH 8.0, 200 mM NaCl and 0.02% NaN<sub>3</sub>. Sequences  
181 encoding HCMV glycoprotein B (gB) Domain II (AA 112-133 + 143-438) from the Merlin  
182 strain was tagged at the 5' end with the UL132 signal peptide sequence  
183 MPAPRGLLRATFLVLVAFGLLLHMDFS and hemagglutinin (HA) tag, and at the 3' end



184 with an avidin and polyhistidine tag. The discontinuous sequence encoding gB Domain  
185 II (AA 112-133 + 343-438) was joined with the flexible linker Ile-Ala-Gly-Ser-Gly. For  
186 Merlin strain gB Domain I (AA133-343), the 5' HA and 3' avidin/polyhistidine tags  
187 omitted due to hypothesized steric hinderance. Nucleotides were codon optimized for  
188 mammalian cells, synthesized *de novo* (Genscript), then cloned into pcDNA3.1(+)  
189 mammalian expression vector (Invitrogen) via *Bam*HI at the 5' end and *Eco*RI site at the  
190 3' end. Plasmids were transiently transfected into 293F suspension cells as previously  
191 described using polyethyleneimine transfection reagent (Sigma-Aldrich) [25].

192 Supernatant was harvested 5 days later, and purified using Nickel-NTA resin for gB  
193 Domain II (Thermo Fisher Scientific), and lectin resin (VWR) for gB Domain I. Purity and  
194 identity were confirmed by Western blot using polyclonal CMV IgG (Cytogam – CSL  
195 Behring) or monoclonal antibodies SM10 (Domain I) and SM5-1 (Domain II).

196

197 **Mapping gB-specific mAb domain specificity by BAMA.** Antibody responses against  
198 full length gB protein (only missing the transmembrane domain), gB ectodomain, and gB  
199 domains were measured as previously described [26]. Carboxylated fluorescent beads  
200 (Luminex) were covalently coupled to purified HCMV antigens and incubated with  
201 monoclonal antibodies in assay diluent (phosphate-buffered saline, 5% normal goat  
202 serum, 0.05% Tween 20, and 1% Blotto milk). The gB domain antigen panel, included full  
203 length gB (generously provided by Sanofi), gB ectodomain, gB domain I, gB domain II,  
204 gB AD-1 (myBiosource), and biotinylated linear gB AD-2 site 2 (biotin-  
205 AHSRSGSVQRVTSS), and biotinylated linear gB AD-2 site 1 (biotin-NETIYNTTLKYGD)  
206 are previously described [13]. All gB proteins are based on the Towne strain gB (genotype

207 1). CMV glycoprotein-specific antibody binding was detected with phycoerythrin-  
208 conjugated goat anti-human IgG (2 µg/mL, Southern Biotech). Beads were washed and  
209 acquired on a Bio-Plex 200 instrument (Bio-Rad), and results were expressed as mean  
210 fluorescence intensity. A panel CMV seronegative plasma samples (n=30) were included  
211 to determine nonspecific baseline levels of binding. Minimal background activity was  
212 observed, so the threshold for positivity for each antigen was set at the mean value (100  
213 MFI) of negative control sera to each antigen + two standard deviations. Blank beads  
214 were used in all assays to account for nonspecific binding. All assays included tracking  
215 of CMV immunoglobulin (Cytogam, generously gifted by CSL Behring) standard by Levy-  
216 Jennings charts. The preset assay criteria for sample reporting were coefficient of  
217 variation per duplicate values of ≤20% for each sample and ≥100 beads counted per  
218 sample. All mAbs were analyzed at a concentration of 30 µg/mL for each antigen: full-  
219 length gB (gift of Sanofi), gB ectodomain, gB Domain I, gB Domain II, gB AD-1 and gB  
220 AD-2 sites 1 and 2. This concentration was predetermined to be within the linear range  
221 of binding based on testing serial dilutions of a small subset of gB specific mAbs (1-155,  
222 1-235, 2-43, 1-189, 3-54, and 3-74).

223  
224 **gB-specific mAb binding strength measured via ELISA.** gB-specific monoclonal  
225 antibody binding responses were measured against full length gB protein (Sanofi), gB  
226 regional epitopes (Ectodomain, Domain I), or gB peptides (AD2 site 1, AD2 site 2). All  
227 gB constructs were solubilized in 0.1 M NaHCO<sub>3</sub>, with proteins plated at a concentration  
228 of 3 µg/mL and peptides at 10 µg/mL respectively. Plates were washed then blocked  
229 before adding gB-specific mAbs at either 5 µg/mL for conformational protein ELISAs or

230 100 µg/mL for peptide ELISAs. After incubation with mAbs, plates were washed and  
231 incubated with a 1:5000 goat-anti human HRP conjugated IgG secondary (Jackson  
232 ImmunoResearch). ELISAs were developed with SeraCare ELISA kit and read at 450  
233 nm.

234

### 235 **Assessment of gB-specific mAb avidity via surface plasmon resonance (SPR).**

236 Postfusion trimeric gB ectodomain was captured on an NTA sensor chip to ~500  
237 response units (RUs) per cycle using a Biacore X100 (GE Healthcare). The chip was  
238 doubly regenerated using 0.35 M EDTA and 0.1 M NaOH followed by 0.5 mM NiCl<sub>2</sub>.  
239 Three samples containing only buffer were injected over both ligand and reference flow  
240 cells, followed by single injections of each mAb at a concentration of 25 nM. Samples  
241 that did not initially result in interpretable sensorgrams were repeated using a  
242 concentration of 250 nM. The resulting data were double-reference subtracted and fit to  
243 a 1:1 binding model using the Biacore X100 Evaluation software.

244

245 **gB genotype-specific transfected cell binding.** HEK293T cells were cultured  
246 overnight to ~50% confluency in a T25 flask, and then co-transfected using TransIT-  
247 mRNA Transfection Kit (Mirus Bio) with a GFP-expressing mRNA plasmid (Miltenyi  
248 Biotec) and a second plasmid encoding either full length gB from genotypes 1, 2, 3, 4,  
249 or 5 (UPenn, Drew Weissman). Transfected cells were incubated at 37°C and 5% CO<sub>2</sub>  
250 for 24 hours, washed with PBS once, and detached using 0.05% trypsin + EDTA  
251 (Thermo Fisher Scientific). Cells were re-suspended in DMEM complete medium and  
252 counted using Countess Automated Cell Counter (Invitrogen). 100,000 cells were

253 placed in tubes and stained with LIVE/DEAD Aqua Dead Cell Staining Kit (Thermo  
254 Fisher Scientific) diluted 1:1000 at room temperature for 20 minutes. 50,000 live cells  
255 were placed in each well of a 96-well V-bottom plate (Corning). The plates were  
256 centrifuged at 1,200 x g for 5 minutes and the supernatants were aspirated. Cells were  
257 incubated with monoclonal antibodies, which were diluted to 5  $\mu$ g/ml in duplicate in  
258 DMEM complete medium, at 37°C and 5% CO<sub>2</sub> for 2 hours. After washing with wash  
259 buffer (PBS + 1% FBS) twice, cells were incubated with PE-conjugated mouse anti-  
260 human IgG Fc (Southern Biotech) diluted 1:200 at 4°C for 30 minutes. Following two  
261 additional wash steps, cells in tubes and plates were resuspended and fixed in PBS +  
262 10% formalin for 10 minutes at room temperature. Fixed cells were washed once and  
263 resuspended in wash buffer for flow cytometry. Events were acquired on LSR II  
264 machine (BD biosciences) using high-throughput sampler (HTS). Data were analyzed  
265 with Flowjo software (Tree Star, Inc.), and the PE+ population was identified from the  
266 live GFP+ cell population for each sample. Non-specific binding of PE-conjugated  
267 mouse anti-human IgG Fc was corrected in the analysis.

268

269 **Natural killer (NK) cell CD107a degranulation assay:** Cell-surface expression of  
270 CD107a was used as a marker for NK cell degranulation (7, 8). ARPE cells were plated  
271 at 3x10<sup>4</sup> cells/well in a 96-well flat-bottom tissue culture plate and allowed to incubate  
272 for 24 hours at 37°C. Cells were infected with AD169r-GFP at an MOI of 1.0 or  
273 transfected with gB-encoding mRNA using the TransIT mRNA transfection kit (Mirus  
274 Biosciencies), then incubated a further 48 hours at 37°C. Following incubation,  
275 supernatant was removed and the transfected or infected cell monolayers were washed

276 once with RPMI 1640 containing 10% FBS, HEPES, Pen-Strep-L-Glut, Gentamicin (R10  
277 media) before addition of NK cells. Primary human NK cells were isolated from  
278 peripheral blood mononuclear cells (PBMC) after overnight rest in R10 media with  
279 10ng/mL IL-15 (Miltenyi Biotech) by depletion of magnetically labeled cells (Human NK  
280 cell isolation kit, Miltenyi Biotech).  $5 \times 10^4$  live NK cells were added to each well  
281 containing gB transfected or HCMV-infected ARPE19 cell monolayers. mAbs were  
282 diluted in R10 and added to the cells at a final dilution of 25 $\mu$ g/mL in duplicate. Brefeldin  
283 A (GolgiPlug, 1  $\mu$ l/ml, BD Biosciences), monensin (GolgiStop, 4 $\mu$ l/6mL, BD  
284 Biosciences), and CD107a-FITC (BD Biosciences, clone H4A3) were added to each  
285 well and the plates were incubated for 6 hours at 37°C in a humidified 5% CO<sub>2</sub>  
286 incubator. NK cells were then gently resuspended, taking care not to disturb the ARPE-  
287 19 cell monolayer, and the NK containing supernatant was collected and transferred to  
288 96-well V-bottom plates. The recovered NK cells were washed with PBS, and stained  
289 with LIVE/DEAD Aqua Dead Cell Stain at a 1:1000 dilution for 20 minutes at room  
290 temperature. The cells were then washed with 1%FBS PBS and stained for 20 minutes  
291 at room temperature with the following panel of fluorescently conjugated antibodies  
292 diluted in 1%FBS PBS: CD56-PECy7 (BD Biosciences, clone NCAM16.2), CD16-  
293 PacBlue (BD Biosciences, clone 3G8), and CD69-BV785 (BioLegend, Clone FN50).  
294 The cells were then washed with 1%FBS PBS, fixed and permeabilized for 20 minutes  
295 at 4°C (BD Fixation/Permeabilization solution), washed with BD Perm/Wash, and  
296 stained for intracellular interferon (IFN)- $\gamma$ -BV711 (BioLegend, clone 4S.B3) and tumor  
297 necrosis factor-alpha (TNF)- $\alpha$ - BV650 (BD Biosciences, clone Mab11) for 30 minutes at  
298 4°C. The cells were then washed twice and re-suspended in 1% paraformaldehyde

299 fixative for flow cytometric analysis. Data analysis was performed using FlowJo software  
300 (v9.9.6). Data is reported as the % of CD107a+ live NK cells (singlets, lymphocytes,  
301 aqua blue-, CD56+ and/or CD16+, CD107a+). The threshold for positivity is the mean  
302 response of preimmune samples plus two standard deviations. CD69, TNF $\alpha$ , and IFN $\gamma$   
303 were not included in the final analysis due to the low frequency of CD107a+ responses.

304  
305 **Antibody dependent cellular phagocytosis (ADCP):** Approximately  $3.5 \times 10^6$  PFU of  
306 concentrated, sucrose gradient-purified AD169r-GFP virus was transferred to a 100,000  
307 kDa Amicon filter (Millipore), then buffer exchanged with 1x PBS, concentrated down to  
308 approximately 100  $\mu$ L, and transferred to a microcentrifuge tube. Next, 10  $\mu$ g of AF647  
309 NHS ester (Invitrogen) reconstituted in DMSO was added to the concentrated, purified  
310 virus for direct fluorescent conjugation, then this reaction mixture was incubated at room  
311 temperature for 1 hour with constant agitation. The reaction was quenched with 80  $\mu$ L of  
312 1 M Tris-HCl, pH 8.0, then the fluorophore-labelled virus was diluted 25x in wash buffer  
313 (PBS + 0.1% FBS). mAbs were diluted to 0.1 mg/mL in wash buffer, then 10  $\mu$ L of each  
314 diluted mAb was combined with 10  $\mu$ L of diluted, fluorophore-conjugated virus in a  
315 round-bottom, 96-well plate and allowed to incubate at 37°C for 2 hours. Following this  
316 incubation step, 50,000 THP-1 cells were added to each well, suspended in 200  $\mu$ L  
317 primary growth media. Plates were centrifuged at 1200x g and 4°C for 1 hour in a  
318 spinoculation step, then incubated at 37°C for an additional hour. Cells were re-  
319 suspended and transferred to a 96-well V-bottom plate, then washed twice prior to  
320 fixation in 100  $\mu$ L DPBS + 1% formalin. Events were acquired on LSR II machine (BD  
321 biosciences) using the HTS. The % AF647+ cells was calculated from the full THP-1 cell

322 population and reported for each sample. A cutoff for a sample mediating ADCP was  
323 defined as > 99% AF647+ signal from THP1 cells incubated with fluorophore  
324 conjugated virus and an HCMV seronegative control.

325

326

327

328

329

330

331

332

333

334

335

336

337

338

339

340

341

342

343

344

345 **Results**

346 *Mapping the domain-specificity of non-neutralizing gB-specific mAbs from HCMV*

347 *seropositive individuals*

348 We first mapped the binding specificity of the panel of gB-specific mAbs for defined  
349 neutralizing and non-neutralizing antigenic domains of gB by BAMA. The most frequent  
350 binding specificity was against Domain II (37.5%), as well as AD2 site 2 (12.5%) and  
351 AD3/MPER (12.5%) (Figure 1A). While 4 mAbs demonstrated detectable binding to  
352 both linear AD2 Site 1 and Site 2, these mAbs are likely AD2 Site 2 specific, given that  
353 previously described AD2 Site 1 mAbs have neutralizing activity [27, 28]. Interestingly,  
354 there were three mAbs, 1-155, 1-237, and 3-18, which bound full length gB, (Sanofi),  
355 but did not bind a gB ectodomain that excludes the membrane proximal region (MPER)  
356 and the cytodomain containing AD3, suggesting specificity for one of these regions.  
357 There are two groups of clonal populations of mAbs found in Individual 1, including  
358 mAbs 1-189, 1-190, 1-191, 1-192 which bind full length gB and gB ectodomain  
359 conformationally, but not to a defined epitope (termed “conformational” binding), and  
360 mAbs 1-223 and 1-224. Antigenic domain-specificity of gB-specific mAbs was  
361 heterogenous in Individual 1, but was dominated by Domain II in individuals 2 (57.1%)  
362 and 3 (66.7%) (Figure 1B). The binding profile for the combined panel of 24 gB-specific  
363 mAbs notably excludes any AD1 or AD5 (Domain I) binding mAbs, despite the  
364 polyclonal CMV-IgG preparation Cytogam binding to all antigens (data not shown).

365

366 *mAb binding kinetics to full length gB and trimeric post-fusion gB ectodomain*



367 Next, we sought to describe the binding kinetics of each gB-specific mAb to the full  
368 length gB protein vs a trimeric post-fusion gB ectodomain construct. By understanding  
369 discrepancies in binding between full length gB and the post-fusion gB ectodomain, we  
370 aimed to highlight novel HCMV AD3 or MPER-specific mAbs and their binding kinetics.  
371 Multiple mAbs (1-155, 1-189, 1-191, 1-192, 1-237) exhibited poor binding strength to  
372 post-fusion gB (ectodomain), but retained robust binding to full length gB. MAbs 3-18  
373 and 3-58 exhibited poor gB binding to both full length gB and post fusion gB ectodomain  
374 (Table 1).

375 Three isolated gB-specific mAbs with binding to both the linear AD2 Site 1 and  
376 Site 2 regions, regardless of individual donor, demonstrated both high binding strength  
377 and avidity for full length gB ( $EC_{50}$  0.001 – 0.009  $\mu\text{g}/\text{mL}$ ) and gB ectodomain (0.002 –  
378 0.013  $\mu\text{g}/\text{mL}$ ) (Table 1). gB mAbs with AD2 site 2 only specificity also had robust  
379 binding to full length gB ( $EC_{50}$  0.003 – 0.006  $\mu\text{g}/\text{mL}$ ) as well as gB ectodomain (0.004 –  
380 0.008  $\mu\text{g}/\text{mL}$ ) (Table 1). Of the mAbs which bound Domain II, all except three, 1-228, 3-  
381 58 and 3-74, showed strong binding to both full length gB and gB ectodomain ( $EC_{50}$  <  
382 0.020  $\mu\text{g}/\text{mL}$ ) (Table 1). Specifically, mAb 3-74, which binds Domain II predominantly,  
383 demonstrated poor binding and avidity to both full length gB and gB ectodomain by  
384 ELISA and SPR. Two Domain II-specific mAbs bound with an interesting pattern to gB  
385 ectodomain. Domain II-specific mAb 1-228 had strong binding to full length gB ( $EC_{50}$   
386 0.001  $\mu\text{g}/\text{mL}$ ) but very poor binding to gB ectodomain by ELISA ( $EC_{50}$  8.014  $\mu\text{g}/\text{mL}$ ) and  
387 no detectable (N.D.) avidity by SPR (Table 1). Further, Domain II-specific mAb 3-58 had  
388 poor binding strength to both full length gB ( $EC_{50}$  5.73  $\mu\text{g}/\text{mL}$ ) and gB ectodomain ( $EC_{50}$   
389 20.56  $\mu\text{g}/\text{mL}$ ) (Table 1).

390 MAbs which bound to the full length gB and not the ectodomain in the gB domain  
391 mapping, and therefore potentially bind AD3/MPER, 1-155 and 1-237, followed  
392 predictable patterns of binding with strong binding to full length gB ( $EC_{50} < 0.004 \mu\text{g/mL}$ )  
393 and negligible binding strength and avidity to gB ectodomain (Figure 1A, Table 1). mAb  
394 3-18, also determined to be AD3/MPER specific by BAMA, demonstrated poor binding  
395 measured by both ELISA ( $EC_{50} > 100 \mu\text{g/mL}$ ) and SPR ( $K_D 22.5 \text{ nM}$ ) to the ectodomain  
396 as well. Finally, those mAbs which didn't have a definable epitope specificity by gB  
397 domain mapping, and termed "conformational", had highly variable binding strength to  
398 gB ectodomain, but fairly strong binding to full length gB. Interestingly, mAb 2-32, which  
399 bound both full length gB ( $EC_{50} 0.003 \mu\text{g/mL}$ ) and gB ectodomain ( $EC_{50} 0.006 \mu\text{g/mL}$ )  
400 well via ELISA, as well as has binding detected to both the full length gB and gB  
401 ectodomain antigens via BAMA (Figure 1A), demonstrated undetectable binding to gB  
402 ectodomain by SPR (N.D., not detectable).

403

#### 404 *Cell associated gB DNA transfected-cell binding*

405 We have recently discovered that the magnitude of binding to gB DNA transfected cells  
406 is a correlate of protection against primary HCMV acquisition in postpartum and  
407 adolescent women vaccinated with gB/MF59 in phase II clinical trials [19]. Next, we  
408 investigated whether binding to cell associated gB is dependent upon gB-specific mAb  
409 antigenic site specificity. gB-specific mAbs with AD-2 specificity demonstrated high  
410 magnitude binding to cell associated gB more consistently than mAbs from any other  
411 specificity represented in our panel (Figure 2A). AD-3 specific mAbs bind poorly to cell  
412 associated gB, consistent with epitope location in the transmembrane and cytosolic

413 compartment [12]. Notably, binding to cell associated gB was not correlated to strength  
414 of binding to soluble gB measured by ELISA (Figure 2B). These findings demonstrate  
415 that gB-mAbs of various specificities, except for AD3, are capable of binding cell  
416 associated gB with high magnitude.

417

#### 418 *Cell associated gB genotype-specific mAb binding*

419 We previously reported that gB/MF59 vaccinees may have had reduced acquisition of  
420 HCMV strains with gB1 genotype, the genotype matched to the vaccine construct,  
421 suggesting strain-specific protection [29]. As such, we next explored how non-  
422 neutralizing gB-specific mAbs differentially recognize gB genotypes 1-5, as expressed  
423 on the surface of a cell. Comparison of total, and genotype specific, gB transfected cell  
424 bound populations of each gB-specific mAb (Figure 3A) highlights significant variability  
425 for cell-associated gB binding across epitope specificities. While a majority of gB-  
426 specific mAbs bound all 5 genotypes, there was unequal binding magnitude across  
427 genotypes for the same mAb. To compare genotype preference amongst gB-specific  
428 mAbs (Figure 3B), we next assessed the percent representation of each genotype in the  
429 sum total gB genotype binding for each mAb. Here, there emerged a clear preference  
430 for gB-specific mAbs isolated from these naturally-infected donors for gB genotypes 2  
431 and 4, representing the cumulative genotype preference for 11 of 14 gB-specific mAbs  
432 with gB genotype specific binding (Figure 3C). Genotype-dominant binding was  
433 determined by mAbs which bound a single gB genotype with a % PE positive population  
434 greater than 5x the % PE positive population of the lowest bound gB genotype. These  
435 findings are consistent across epitope specificities. Interestingly, mAbs which were

436 unable to bind gB ectodomain measured by ELISA or BAMA, but bound full length gB  
437 and classified as AD3 specific, demonstrated equivalent cell associated gB binding  
438 across all tested gB genotypes (Figure 3A). These data implicate differences in epitope  
439 presentation of soluble gB and cell-associated gB.

440

#### 441 *Antibody dependent cellular cytotoxicity (ADCC)*

442 Antibody-mediated NK cell cytotoxicity has been demonstrated as a crucial mechanism  
443 for controlling HCMV infection [30, 31]. To distinguish the domain specificity of gB-  
444 specific mAbs which mediate ADCC, we next screened our panel of mAbs for ability to  
445 mediate two well defined NK phenotypes of cytotoxic killing, CD107a upregulation,  
446 indicative of degranulation, (Figure 4A) and CD16 downregulation, indicative of NK cell  
447 activation (Figure 4B) in the presence of HCMV AD169r infected cell targets. While a  
448 number of mAbs across multiple domains demonstrated measurable CD107a  
449 degranulation, they were comparable to the negative control Synagis (mAb against  
450 respiratory syncytial virus). Next, a more specific marker of NK cell activation, CD16  
451 downregulation calculated into a downregulation index (DRI), was measured for each  
452 gB-specific mAb. Notably, no gB-specific mAb demonstrated significant CD16  
453 downregulation whereas HCMV hyperimmunoglobulin (Cytogam) had demonstrable  
454 activity.

455

#### 456 *gB AD2 Site 1/Site 2 and Domain II-specific mAbs 1-235 and 3-74 mediate ADCP*

457 In a study of functional antibody responses to gB/MF59 vaccination, vaccinees were  
458 found to demonstrate limited neutralization responses, but robust ADCP [13]. To identify

459 the domain specificity of gB-specific mAbs which can mediate ADCP, we screened our  
460 panel of gB-specific mAbs for ability to mediate whole virion phagocytosis (Figure 5A).  
461 Two gB-specific mAbs, 1-235 and 3-74, mediated phagocytosis of AD169r-GFP virions,  
462 which exceeded the baseline ADCP level of non-specific mAbs and seronegative  
463 control plasma by 19.4% and 14.7% respectively. To better assess their ADCP potency  
464 in both THP-1 cells and primary monocytes isolated from healthy donors (Figure 5B),  
465 mAbs 1-235 and 3-74 were titrated from a concentration of 100  $\mu$ g/mL. ADCP increased  
466 in a dose-dependent manner for 1-235 and 3-74 in both THP1 cells and primary  
467 monocytes. Importantly, the gB epitope specificity of ADCP mediating mAb 1-235 was  
468 AD2 Site 1 and Site 2, while 3-74 specificity was Domain II (Figure 1A).

469

470

471

472

473

474

475

476

477

478

479

480

481

## 482 **Discussion**

483 Identification of the dominant non-neutralizing antibody responses elicited by the  
484 partially-protective gB/MF59 vaccine has suggested a shift in the paradigm of  
485 immunogenicity endpoints for consideration when designing the next generation of  
486 HCMV vaccines [13]. While protective immunity through virus neutralization to prevent  
487 primary infection is considered the “gold standard” of HCMV vaccine development, next  
488 generation vaccine regimens will need to consider these non-neutralizing anti-viral  
489 antibodies. Indeed, strategies such as cell-to-cell spread enable immunologically-covert  
490 spread of infection even in the presence of neutralizing antibodies [32]. In fact,  
491 prophylactic passive immunization with both neutralizing and non-neutralizing mAbs  
492 were considered equally protective in a murine cytomegalovirus challenge model [33].  
493 Accordingly, non-neutralizing antibodies which mediate effector functions like ADCP,  
494 like those described in this study, may have potential importance as immunological  
495 endpoints of a protective HCMV vaccine.

496 A majority (> 90%) of gB-specific antibodies from B cell clones have no  
497 neutralizing activity [34]. Indeed, the partially-protective gB/MF59 vaccine elicited limited  
498 heterologous neutralization [13]. While the specificity and characteristics of neutralizing  
499 gB-specific mAbs have been well described, the types of naturally-elicited gB-specific  
500 mAbs that mediate non-neutralizing effector functions which may be critical for  
501 protection against HCMV acquisition remain to be fully characterized.

502 In this study, 24 non-neutralizing gB-specific mAbs isolated from naturally  
503 HCMV-infected individuals were assessed for epitope binding specificity and affinity, gB  
504 genotype preference, and Fc-mediated effector functions. These non-neutralizing mAbs

505 bound predominantly to Domain II, or to one or both of the binding sites of AD2. Domain  
506 II is largely the target of neutralizing antibodies, with one study identifying Domain II-  
507 specific binding by neutralizing antibodies in greater than 90% of HCMV seropositive  
508 subjects tested. Interestingly, three mAbs from the panel demonstrated robust binding  
509 to the full length gB protein but failed to bind a gB ectodomain, suggesting specificity  
510 within the AD3 or MPER region, a portion of the gB construct located in the cytodomain  
511 of membrane associated gB [12]. This potentially hidden region on an intact virion or  
512 infected cell could certainly be exposed through protein shedding from cell lysis or  
513 disruption of the HCMV virion [35], similarly to other viral structural antigens such as  
514 pp150 and pp28. However, it also raises questions regarding the structure of this  
515 membrane-associated region of the protein. Interestingly, none of the non-neutralizing  
516 gB-specific mAbs in this panel had appreciable binding to AD1 or Domain I. AD1 is  
517 targeted by both neutralizing and non-neutralizing mAbs [34, 36]. As such, the lack of  
518 Domain I and AD1 binding from this representative panel could be the result of sampling  
519 bias from only three individuals [23], by selection bias of excluding mAbs which bind to  
520 traditionally neutralizing domains, or non-optimal conformation of the protein used for B  
521 cell sorting to isolate these mAbs.

522         Antibodies mediating neutralization after gB/MF59 vaccination and natural  
523 infection can be strain specific [13, 37] and may not provide equivalent degrees of  
524 protection against all strains. It has been reported that breakthrough HCMV infections in  
525 the vaccine subjects receiving gB/MF59, which is a gB genotype 1 based vaccine, were  
526 more likely to be infected with HCMV strains expressing gB genotypes 3 or 5 than  
527 strains 1, 2, or 4 [29]; evidence suggesting gB/MF59 induced antibodies were limited

528 due to its strain-specific neutralization or strain-specific antibody effector functions. Our  
529 study offers the first evidence that critical gB-specific non-neutralizing antibodies have  
530 different strain specific gB recognition when displayed on the surface of a cell. This  
531 panel of non-neutralizing gB-specific mAbs generally bound with greater preference to  
532 gB genotypes 2 and 4. These findings are in concordance with phylogenetic clustering  
533 of the 5 clinically significant HCMV gB genotypes 1/2/4 and 3/5 into two supergroups  
534 [29]. The lack of knowledge regarding which HCMV gB genotype or genotypes infected  
535 the individuals from which the mAbs were isolated limits the assertions we can make  
536 about how gB genotype specific antibodies may be raised by natural infection. Clinically,  
537 prevalence of HCMV gB variants may be influenced by geography, immune status, and  
538 prior infection with HCMV of other gB variants [38-40]. Future efforts might address the  
539 question of gB variant specific non-neutralizing recognition and antibody function by  
540 utilizing mAbs isolated from individuals that have been tested for endogenous viral  
541 strains or have known exposure to a specific gB genotype variant.

542 A notable finding from studying full-length gB-binding mAbs that may be AD3- or  
543 MPER- specific, is their breadth of membrane associated gB binding. These mAbs, 1-  
544 155, 1-237, and 3-18 demonstrate negligible gB ectodomain and postfusion gB trimer  
545 binding by both ELISA and SPR yet yield comparable signals for transfected cell binding  
546 to other gB ectodomain binding mAbs. With AD3 thought to be buried in the cytodomain  
547 [12], these findings raise the question: how do presentation of gB epitopes differ as a  
548 soluble protein versus a membrane-associated protein? As a viral fusogen, gB is  
549 thought to undergo transformation from a prefusion conformation to a postfusion  
550 conformation to facilitate entry into a host cell [21, 41]. While this study does not define



551 a specific prefusion structure, it does highlight how a distinct prefusion-like gB on a cell  
552 surface may expose different epitopes than soluble postfusion gB, potentially  
553 accounting for improved membrane associated gB binding of AD3-specific mAbs.  
554 Notably, it was recently reported that the ability of gB/MF59 vaccine sera to bind to gB  
555 transfected cells predicts risk of HCMV acquisition [19]. Taken together, these findings  
556 warrant further investigation of gB conformation-specific antibody binding, to parse out  
557 the epitope binding specificity and effector functions of gB vaccine-elicited Abs.

558         This study demonstrates the first effort to identify gB domain specificity and  
559 function of antibodies that mediate Fc receptor functions like ADCP and ADCC elicited  
560 by natural HCMV infection. While little is known about gB-specific non-neutralizing  
561 functions in naturally-infected individuals, investigations of gB/MF59 vaccinees has  
562 shown this class of antibody may indeed be a desirable target of vaccines that aim to  
563 protect against primary HCMV acquisition [13]. It is now evident that non-neutralizing  
564 Abs are not limited to traditional “non-neutralizing” epitopes [12, 17]. Even more, these  
565 mAbs, while preferentially binding to certain gB genotypes, retain the ability to bind  
566 across a spectrum of gB genotype variants. Ultimately this work contributes to the field  
567 of HCMV vaccinology by emphasizing the impact of epitope binding specificity, binding  
568 strength, and genotype breadth amongst functional non-neutralizing gB-specific mAbs.  
569 By improving our knowledge of gB immunogenicity elicited by natural infection, and the  
570 specificity of antibody responses that may mediate key functions other than traditional  
571 neutralization, this work informs rational design of new HCMV vaccines that aim to  
572 reduce the devastating burden of HCMV disease in both congenital infection and  
573 transplant settings.

574 **Acknowledgements:**

575 The authors recognize Justin Pollara and Whitney Edwards for their assistance with the  
576 antibody dependent cellular cytotoxicity assays. The gB-specific monoclonal antibodies  
577 were kindly provided by Dai Wang at Merck through a collaboration with Zhiqiang An's  
578 laboratory at the University of Texas Health Science Center at Houston. This work was  
579 supported by grants from Merck Research Labs and the Welch Foundation (AU-0042-  
580 20030616 to Z.A), NIH/ National Institute of Allergy and Infectious Disease R21  
581 (R21AI136556 to S.R.P). Dr Permar consults for Merck, Pfizer, Sanofi, and Moderna  
582 vaccine programs and has sponsored programs from Merck and Moderna around CMV  
583 vaccine immunity. A patent application covering the mabs described in the article has  
584 been submitted by Merck &Co., Inc. and University of Texas. D.W. is a current  
585 employee and stockholders of Merck & Co., Inc.

586

587

588

589

590

591

592

593

594

595

596

597 References:

- 598 1. Kenneson, A. and M.J. Cannon, *Review and meta-analysis of the epidemiology of*  
599 *congenital cytomegalovirus (CMV) infection*. Rev Med Virol, 2007. **17**(4): p. 253-76.
- 600 2. Boppana, S.B., S.A. Ross, and K.B. Fowler, *Congenital cytomegalovirus infection: clinical*  
601 *outcome*. Clin Infect Dis, 2013. **57 Suppl 4**: p. S178-81.
- 602 3. Boppana, S.R., Lisa; Folwer, Karen; Mach, Michael; Britt, William, *Intrauterine*  
603 *transmission of cytomegalovirus to infants of women with preconceptional immunity*.  
604 The New England Journal of Medicine, 2001. **344**(18): p. 1366-1371.
- 605 4. Manicklal, S., et al., *The "silent" global burden of congenital cytomegalovirus*. Clin  
606 Microbiol Rev, 2013. **26**(1): p. 86-102.
- 607 5. Boppana, S.B. and W.J. Britt, *Antiviral Antibody Responses and Intrauterine Transmission*  
608 *after Primary Maternal Cytomegalovirus Infection*. The Journal of Infectious Diseases,  
609 1995. **171**: p. 1115-1121.
- 610 6. Kotton, C., *Management of Cytomegalovirus infection in solid organ transplantation*.  
611 Nature Reviews Nephrology, 2010. **12**: p. 711-721.
- 612 7. Streblow, D.N., S.L. Orloff, and J.A. Nelson, *Acceleration of allograft failure by*  
613 *cytomegalovirus*. Curr Opin Immunol, 2007. **19**(5): p. 577-82.
- 614 8. Bialas, K.M. and S.R. Permar, *The March towards a Vaccine for Congenital CMV:*  
615 *Rationale and Models*. PLoS Pathog, 2016. **12**(2): p. e1005355.
- 616 9. Bernstein, D.I., et al., *Safety and efficacy of a cytomegalovirus glycoprotein B (gB)*  
617 *vaccine in adolescent girls: A randomized clinical trial*. Vaccine, 2016. **34**(3): p. 313-9.

- 618 10. Pass, R.F., et al., *Vaccine prevention of maternal cytomegalovirus infection*. N Engl J  
619 Med, 2009. **360**(12): p. 1191-9.
- 620 11. Griffiths, P.D., et al., *Cytomegalovirus glycoprotein-B vaccine with MF59 adjuvant in*  
621 *transplant recipients: a phase 2 randomised placebo-controlled trial*. The Lancet, 2011.  
622 **377**(9773): p. 1256-1263.
- 623 12. Burke, H.G. and E.E. Heldwein, *Crystal Structure of the Human Cytomegalovirus*  
624 *Glycoprotein B*. PLoS Pathog, 2015. **11**(10): p. e1005227.
- 625 13. Nelson, C.S., et al., *HCMV glycoprotein B subunit vaccine efficacy mediated by*  
626 *nonneutralizing antibody effector functions*. Proc Natl Acad Sci U S A, 2018. **115**(24): p.  
627 6267-6272.
- 628 14. Baraniak, I., et al., *Protection from cytomegalovirus viremia following glycoprotein B*  
629 *vaccination is not dependent on neutralizing antibodies*. Proc Natl Acad Sci U S A, 2018.  
630 **115**(24): p. 6273-6278.
- 631 15. Kuijpers, T., et al., *Human NK cells can control CMV infection in the absence of T cells*.  
632 Blood, 2008. **112**(3): p. 914-915.
- 633 16. Mitrovic, M., et al., *Innate immunity regulates adaptive immune response: lessons*  
634 *learned from studying the interplay between NK and CD8+ T cells during MCMV*  
635 *infection*. Med Microbiol Immunol, 2012. **201**(4): p. 487-95.
- 636 17. Meyer, H., et al., *Glycoprotein gp116 of human cytomegalovirus contains epitopes for*  
637 *strain-common and strain-specific antibodies*. Journal of General Virology, 1992. **73**(9):  
638 p. 2375-2383.

- 639 18. Tarrago, D., C. Quereda, and A. Tenorio, *Different Cytomegalovirus Glycoprotein B*  
640 *Genotype Distribution in Serum and Cerebrospinal Fluid Specimens Determined by a*  
641 *Novel Multiplex Nested PCR*. Journal of Clinical Microbiology, 2003. **41**(7): p. 2872-2877.
- 642 19. Jenks, J.A., et al. *Protection against human cytomegalovirus acquisition is associated*  
643 *with IgG binding to cell-associated CMV glycoprotein B in two historical gB/MF59*  
644 *vaccine cohorts*. in *ID Week*. 2019. Washington, D.C.
- 645 20. Rey, F.A., et al., *Different functional states of fusion protein gB revealed on human*  
646 *cytomegalovirus by cryo electron tomography with Volta phase plate*. PLOS Pathogens,  
647 2018. **14**(12).
- 648 21. Heldwein, E.E., et al., *Crystal Structure of Glycoprotein B from Herpes Simplex Virus 1*.  
649 Science, 2006. **313**(5784): p. 217-220.
- 650 22. Baraniak, I., et al., *Epitope-Specific Humoral Responses to Human Cytomegalovirus*  
651 *Glycoprotein-B Vaccine With MF59: Anti-AD2 Levels Correlate With Protection From*  
652 *Viremia*. J Infect Dis, 2018. **217**(12): p. 1907-1917.
- 653 23. Xia, L., et al., *Active evolution of memory B-cells specific to viral gH/gL/pUL128/130/131*  
654 *pentameric complex in healthy subjects with silent human cytomegalovirus infection*.  
655 Oncotarget, 2017. **8**(43): p. 73654-73669.
- 656 24. Sharma, S., et al., *HCMV gB shares structural and functional properties with gB proteins*  
657 *from other herpesviruses*. Virology, 2013. **435**(2): p. 239-49.
- 658 25. Liao, H.X., et al., *Initial antibodies binding to HIV-1 gp41 in acutely infected subjects are*  
659 *polyreactive and highly mutated*. J Exp Med, 2011. **208**(11): p. 2237-49.

- 660 26. Bialas, K.M., et al., *Maternal Antibody Responses and Nonprimary Congenital*  
661 *Cytomegalovirus Infection of HIV-1-Exposed Infants*. J Infect Dis, 2016. **214**(12): p. 1916-  
662 1923.
- 663 27. McVoy, M.M., E. Tenorio, and L.M. Kauvar, *A Native Human Monoclonal Antibody*  
664 *Targeting HCMV gB (AD-2 Site I)*. Int J Mol Sci, 2018. **19**(12).
- 665 28. Kauvar, L.M., et al., *A high-affinity native human antibody neutralizes human*  
666 *cytomegalovirus infection of diverse cell types*. Antimicrob Agents Chemother, 2015.  
667 **59**(3): p. 1558-68.
- 668 29. Nelson, C.S., et al., *Intrahost Dynamics of Human Cytomegalovirus Variants Acquired by*  
669 *Seronegative Glycoprotein B Vaccinees*. Journal of Virology, 2019. **93**(5): p. e01695-18.
- 670 30. Wu, Z., et al., *Human cytomegalovirus-induced NKG2C(hi) CD57(hi) natural killer cells are*  
671 *effectors dependent on humoral antiviral immunity*. J Virol, 2013. **87**(13): p. 7717-25.
- 672 31. Costa-Garcia, M., et al., *Antibody-mediated response of NKG2Cbright NK cells against*  
673 *human cytomegalovirus*. J Immunol, 2015. **194**(6): p. 2715-24.
- 674 32. Jacob, C.L., et al., *Neutralizing antibodies are unable to inhibit direct viral cell-to-cell*  
675 *spread of human cytomegalovirus*. Virology, 2013. **444**(1-2): p. 140-7.
- 676 33. Bootz, A., et al., *Protective capacity of neutralizing and non-neutralizing antibodies*  
677 *against glycoprotein B of cytomegalovirus*. PLoS Pathog, 2017. **13**(8): p. e1006601.
- 678 34. Potzsch, S., et al., *B cell repertoire analysis identifies new antigenic domains on*  
679 *glycoprotein B of human cytomegalovirus which are target of neutralizing antibodies*.  
680 PLoS Pathog, 2011. **7**(8): p. e1002172.

- 681 35. Klimpel, G.R., *Immune Defenses*, in *Medical Microbiology* B. S, Editor. 1996, University of  
682 Texas Medical Branch at Galveston: Galveston (TX).
- 683 36. Speckner, A., et al., *Antigenic domain 1 of human cytomegalovirus glycoprotein B*  
684 *induces a multitude of different antibodies which, when combined, results in incomplete*  
685 *virus neutralization*. *Journal of General Virology*, 1999. **80**(8): p. 2183-2191.
- 686 37. Klein, M., et al., *Strain-Specific Neutralization of Human Cytomegalovirus Isolates by*  
687 *Human Sera*. *Journal of Virology*, 1999. **73**(2): p. 878-886.
- 688 38. Coaquette, A., et al., *Mixed Cytomegalovirus Glycoprotein B Genotypes in*  
689 *Immunocompromised Patients*. *Clinical Infectious Diseases*, 2004. **39**(2): p. 155-161.
- 690 39. Ishibashi, K., et al., *Strain-specific seroepidemiology and reinfection of cytomegalovirus*.  
691 *Microbes Infect*, 2008. **10**(12-13): p. 1363-9.
- 692 40. Gorzer, I., et al., *Human cytomegalovirus (HCMV) genotype populations in*  
693 *immunocompetent individuals during primary HCMV infection*. *J Clin Virol*, 2010. **48**(2):  
694 p. 100-3.
- 695 41. Si, Z., et al., *Different functional states of fusion protein gB revealed on human*  
696 *cytomegalovirus by cryo electron tomography with Volta phase plate*. *PLOS Pathogens*,  
697 2018. **14**(12): p. e1007452.
- 698

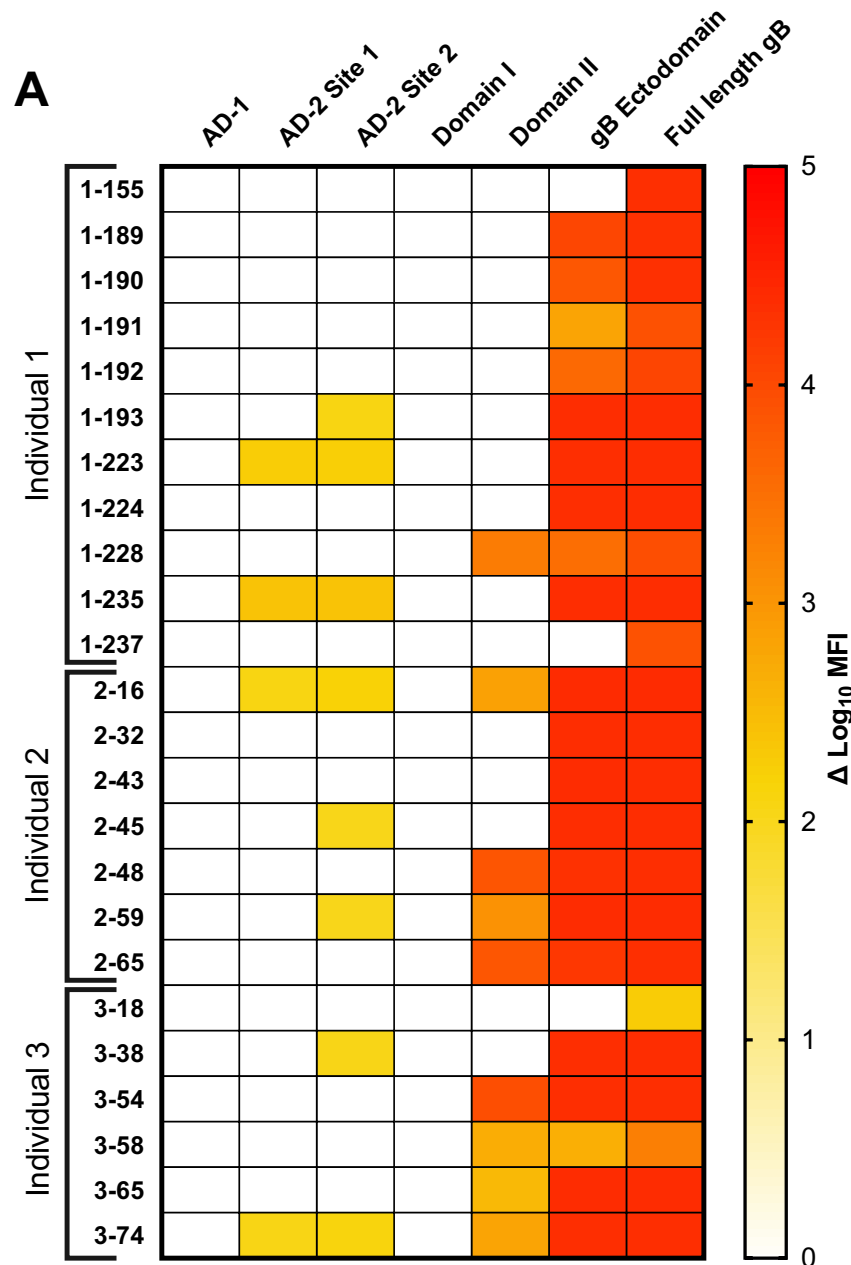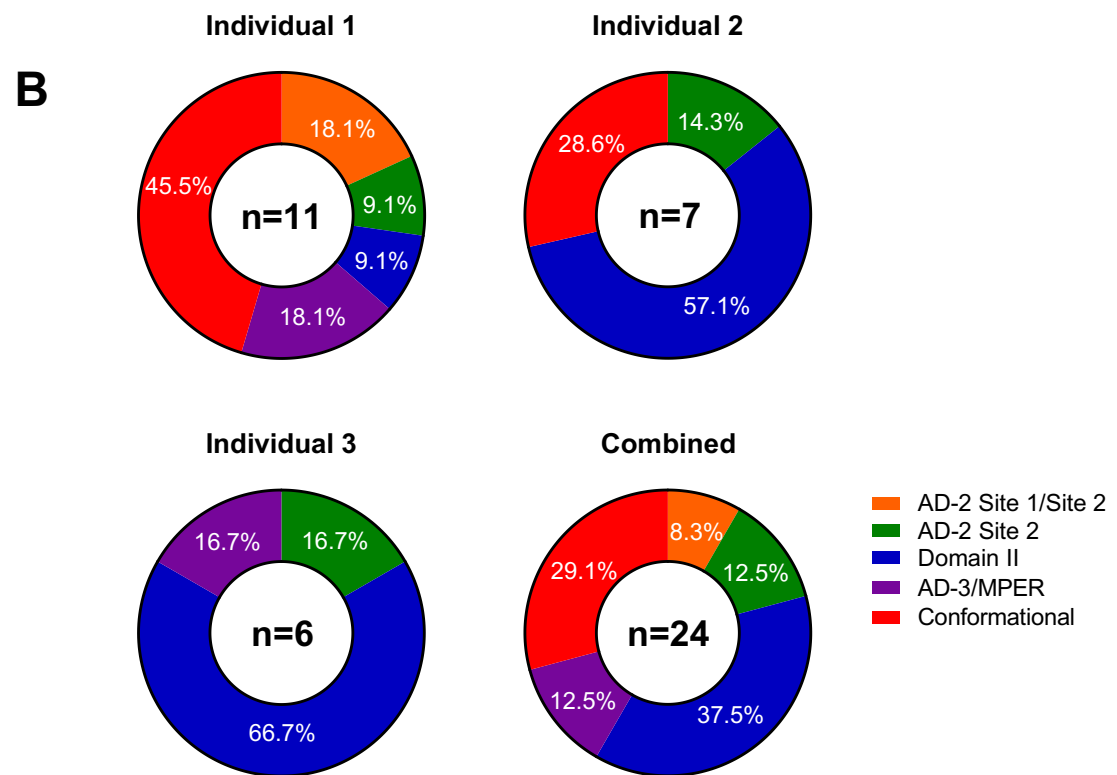

**Figure 1. gB domain-specific mAb binding determined by BAMA.** (A) Heat map of gB domain-specific binding strength for gB-specific mAbs represented as  $\log_{10}$  mean fluorescent intensity (MFI). (B) Pie charts representing the percentage of total gB-specific mAbs binding to each domain specificity assessed by BAMA per each naturally HCMV infected individual and all individuals combined. AD-2 Site 1/Site 2: Binding to both the AD-2 Site 1 and Site 2 peptide, AD-2 site 2: binding to the site 2 peptide only, Domain II: binding to Domain II only, AD3/MPER: binding to full length gB, but not gB ectodomain, Conformational: binding to full length gB and gB ectodomain, but no other domain.



| Monoclonal Antibody | Heavy Chain <sup>a</sup> | Light Chain <sup>a</sup> | CDRH3 Length <sup>a</sup> | Neutralization IC50 (µg/mL) <sup>a</sup> | Epitope Specificity | Full length gB binding EC <sub>50</sub> (µg/mL) <sup>b</sup> | gB ectodomain binding EC <sub>50</sub> (µg/mL) <sup>b</sup> | gB ectodomain apparent avidity KD (nM) <sup>c</sup> |
|---------------------|--------------------------|--------------------------|---------------------------|------------------------------------------|---------------------|--------------------------------------------------------------|-------------------------------------------------------------|-----------------------------------------------------|
| 1-155               | IGHV1-69*01              | IGLV2-11*01              | 14                        | 0                                        | AD3/MPER            | 0.002                                                        | 6.903                                                       | 6.2                                                 |
| 1-189               | IGHV1-69*01              | IGKV4-1*01               | 11                        | 0                                        | Conformational      | 0.007                                                        | 2.562                                                       | 702                                                 |
| 1-190               | IGHV1-69*01              | IGKV4-1*01               | 11                        | 0                                        | Conformational      | 0.019                                                        | 3.716                                                       | 1.88                                                |
| 1-191               | IGHV1-69*01              | IGKV4-1*01               | 11                        | 0                                        | Conformational      | 0.009                                                        | 6.163                                                       | 10.8                                                |
| 1-192               | IGHV1-69*06              | IGKV4-1*01               | 11                        | 0                                        | Conformational      | 0.010                                                        | > 100                                                       | 116                                                 |
| 1-193               | IGHV1-18*01              | IGKV2-30*01              | 22                        | 1                                        | AD2 Site 2          | 0.003                                                        | 0.004                                                       | 0.0003                                              |
| 1-223               | IGHV1-69*03              | IGLV2-23*01              | 22                        | 8.3                                      | AD2 Site 1/Site 2   | 0.009                                                        | 0.013                                                       | 0.301                                               |
| 1-224               | IGHV1-69*03              | IGKV3-20*01              | 22                        | 6.4                                      | Conformational      | 0.006                                                        | 0.011                                                       | 0.116                                               |
| 1-228               | IGHV3-13*01              | IGKV1-33*01              | 10                        | 0                                        | Domain II           | 0.001                                                        | 8.014                                                       | N.D.                                                |
| 1-235               | IGHV4-31*03              | IGKV4-1*01               | 11                        | 0                                        | AD2 Site 1/Site 2   | 0.001                                                        | 0.002                                                       | 0.019                                               |
| 1-237               | IGHV1-69*01              | IGKV4-1*01               | 12                        | 0                                        | AD3/MPER            | 0.003                                                        | 2.656                                                       | 5.27                                                |
| 2-16                | IGHV1-69*01              | IGKV3-15*01              | 15                        | 11                                       | Domain II           | 0.002                                                        | 0.004                                                       | 0.0004                                              |
| 2-32                | IGHV4-59*01              | IGKV4-1*01               | 12                        | 0                                        | Conformational      | 0.003                                                        | 0.006                                                       | N.D.                                                |
| 2-43                | IGHV6-1*01               | IGKV4-1*01               | 14                        | 15                                       | Conformational      | 0.003                                                        | 0.004                                                       | 0.0034                                              |
| 2-45                | IGHV4-34*02              | IGKV3-15*01              | 24                        | 9.8                                      | AD2 Site 2          | 0.003                                                        | 0.006                                                       | 0.0004                                              |
| 2-48                | IGHV1-2*02               | IGKV3-20*01              | 14                        | 14.6                                     | Domain II           | 0.003                                                        | 0.006                                                       | 0.113                                               |
| 2-59                | IGHV4-34*02              | IGLV1-47*01              | 18                        | 2.3                                      | Domain II           | 0.006                                                        | 0.010                                                       | 0.0016                                              |
| 2-65                | IGHV1-2*02               | IGKV3-20*01              | 14                        | 6.4                                      | Domain II           | 0.007                                                        | 0.018                                                       | 0.081                                               |
| 3-18                | IGHV3-21*01              | IGKV1D-8*01              | 26                        | 0                                        | AD3/MPER            | 16.370                                                       | > 100                                                       | 22.5                                                |
| 3-38                | IGHV1-18*01              | IGKV4-1*01               | 14                        | 0                                        | AD2 Site 2          | 0.006                                                        | 0.008                                                       | 0.0003                                              |
| 3-54                | IGHV1-46*01              | IGKV1-5*03               | 22                        | 1                                        | Domain II           | 0.006                                                        | 0.011                                                       | 0.474                                               |
| 3-58                | IGHV3-30*03              | IGLV3-10*01              | 34                        | 0                                        | Domain II           | 5.733                                                        | 20.560                                                      | 1.82                                                |
| 3-65                | IGHV3-33*01              | IGKV4-1*01               | 16                        | 0                                        | Domain II           | 0.003                                                        | 0.003                                                       | 0.036                                               |
| 3-74                | IGHV3-30-3*01            | IGLV3-25*03              | 28                        | 0                                        | Domain II           | 0.601                                                        | 0.723                                                       | 1.52                                                |

**Table 1. gB-specific mAb immunogenetics, binding strength, and avidity to full length gB and gB ectodomain**

- Heavy chain and light chain genes, neutralization IC<sub>50</sub> (µg/mL), as well as CDRH3 length listed as described in (Xia et al 2017).
- binding to full length gB and post fusion gB ectodomain EC<sub>50</sub> (µg/mL) measured by ELISA.
- binding kinetics to post fusion gB ectodomain measured by SPR

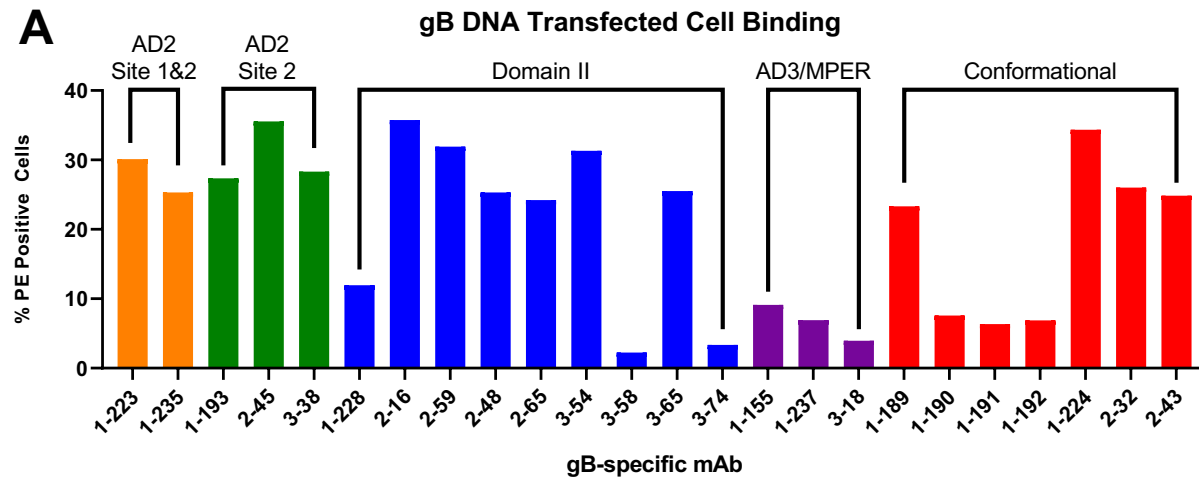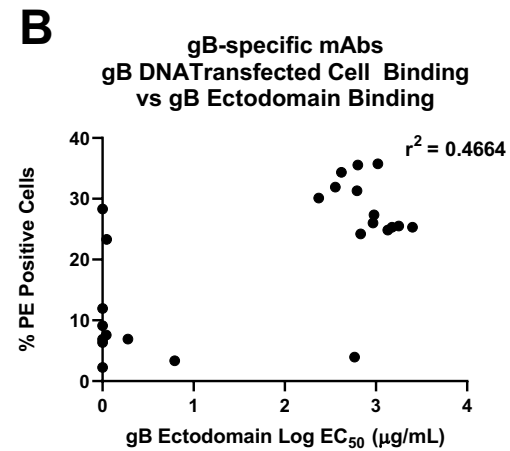

**Figure 2. gB DNA transfected cell binding.** (A) gB-specific mAb binding to cell-associated gB on the surface of gB DNA transfected cells. (B) gB-specific mAbs generally bind with high magnitude to cell-associated gB, but this binding strength is not highly correlated to strength of binding (EC<sub>50</sub>) to soluble gB ectodomain measured by ELISA.

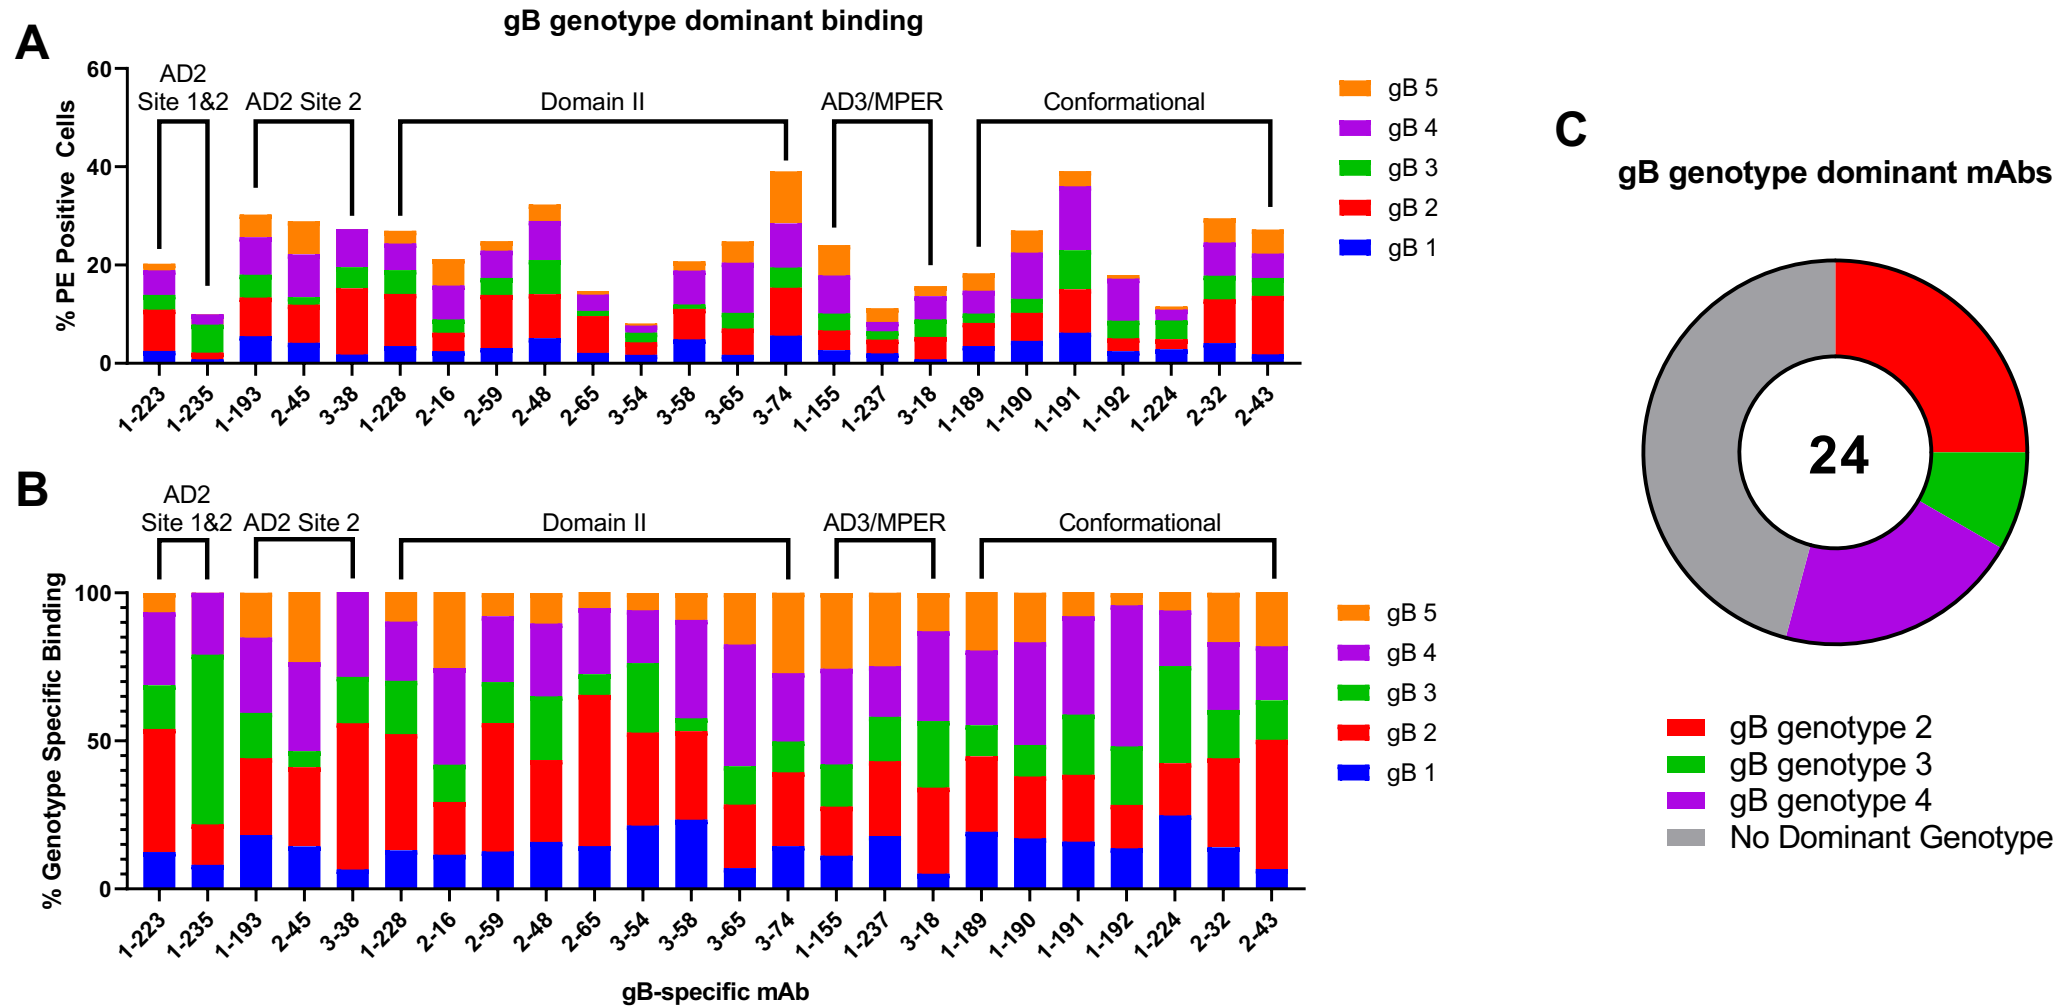

**Figure 3. Cell associated gB genotype-specific mAb binding.** (A) Percentage of gB genotype-specific transfected cells bound by gB-specific mAbs, grouped by domain specificity. (B) Percentage of gB genotype-specific transfected cells bound by the total population of gB transfected cells, demonstrating genotype preference for each gB-specific mAbs, listed by domain specificity. (C) gB-genotype preference for gB-specific mAbs defined if % PE positive population of a single transfected gB genotype was greater than 5 times the % PE positive population of the lowest bound cell-associated gB genotype by that mAb.

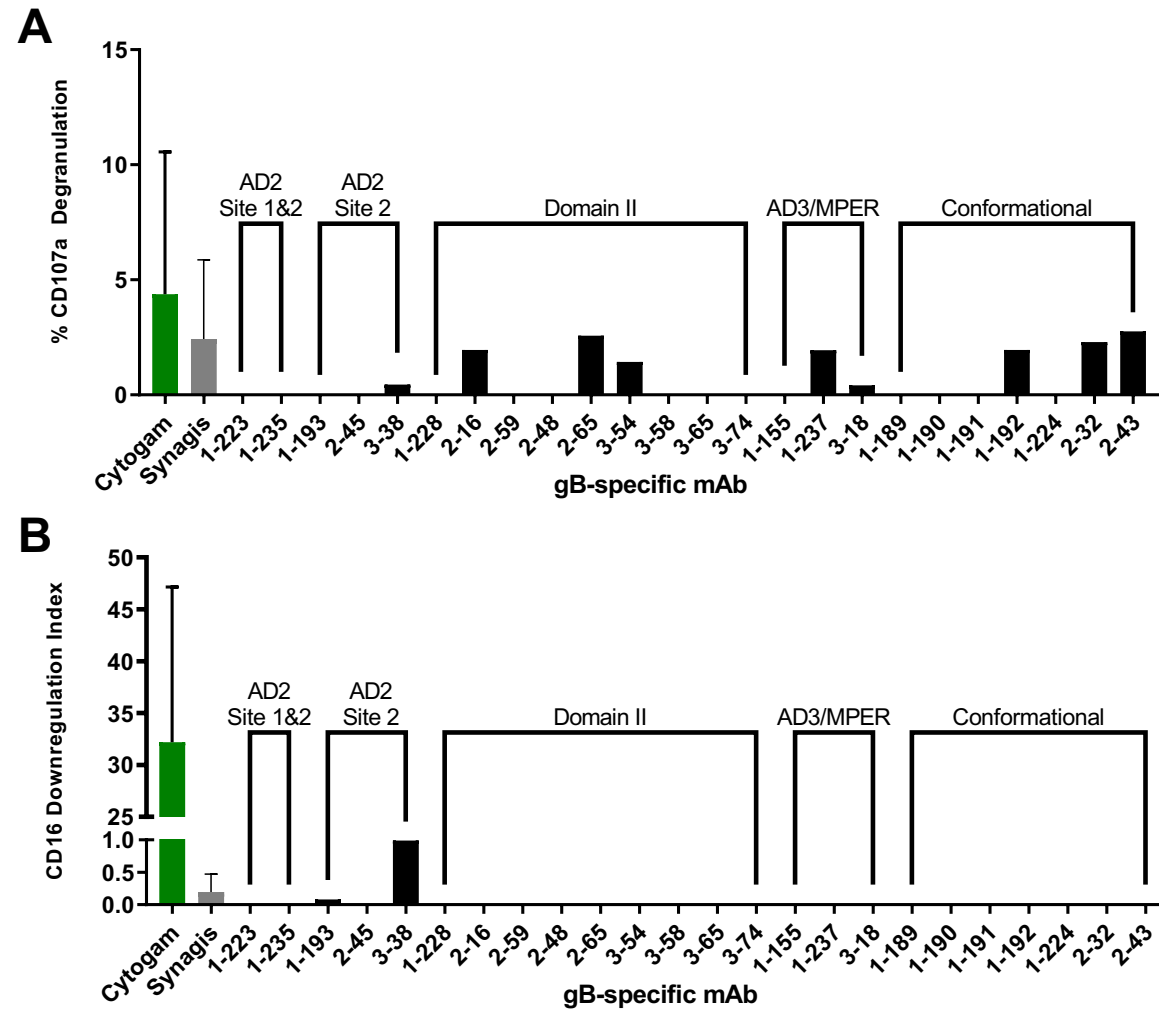

**Figure 4. gB-specific mAbs mediate negligible NK activation ADCC responses when compared to polyclonal CMV-specific antibody preparation (Cytogam).** gB-specific mAbs were screened for mediation of NK cell (A) CD107a degranulation and (B) CD16 downregulation (DRI) as measures of antibody-mediated NK cell activation. Data are presented as mAb specific response against AD169r-GFP infected ARPE19 cells minus mock infected negative control cells.

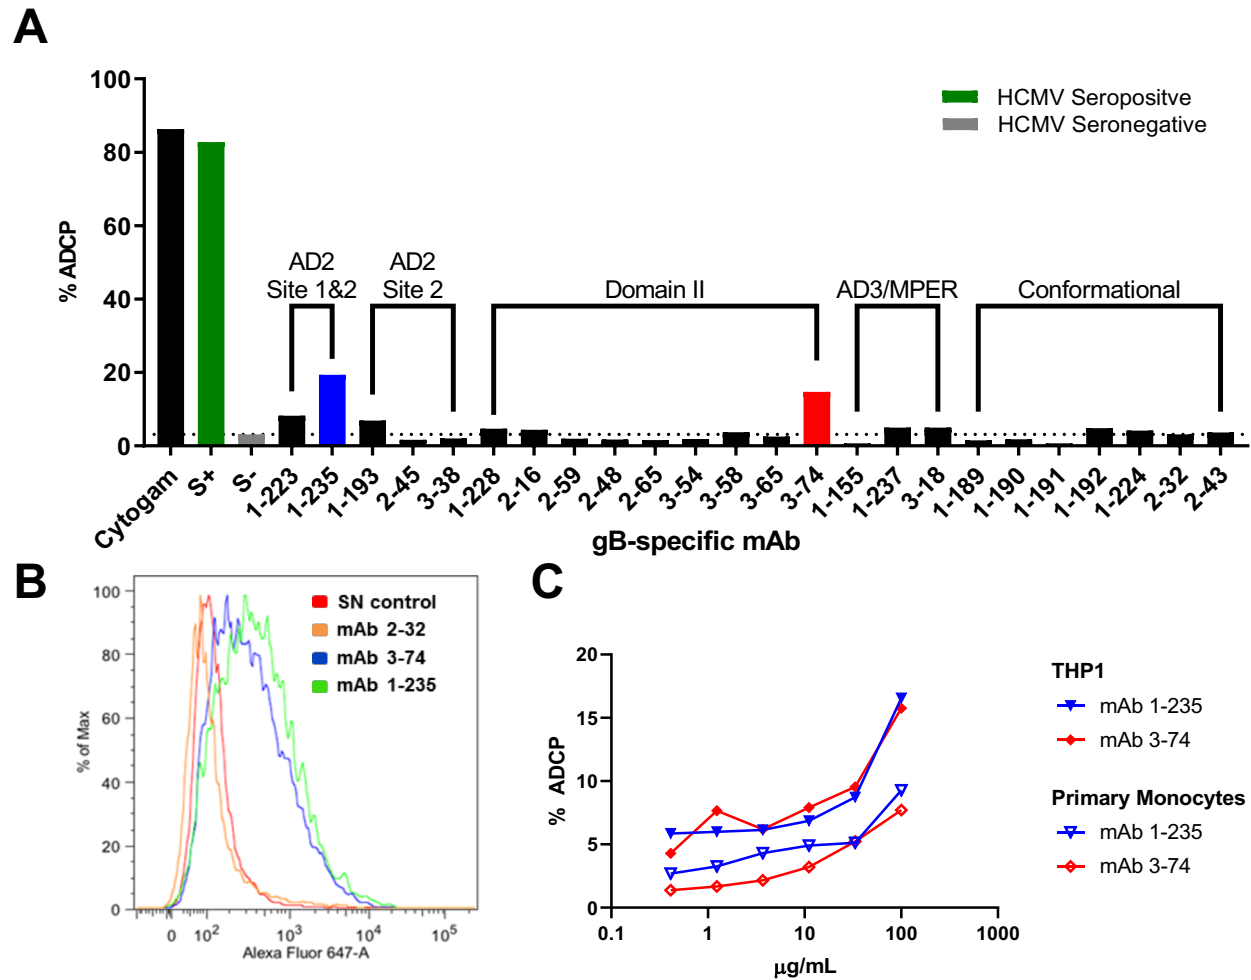

**Figure 5. gB AD2 and Domain-1 specific mAbs 1-235 and 3-74 mediate antibody dependent cellular phagocytosis (ADCP).** (A) gB-specific mAbs were screened for ADCP activity. (B) A representative histogram for ADCP mediating mAbs as compared to a HCMV seronegative control. The magnitude of ADCP was titrated over a dilution series for the two ADCP mediating mAbs using (C) THP1 cells (solid symbols) and primary monocytes (open symbols).
